# Supplementary material
Source: PubMed Central journal article supplement (PMC8130177)
Supplement: NIHPP2021.03.11.434872V2-supplement-1.pdf [file NIHPP2021.03.11.434872V2-supplement-1.pdf]

519 **Supplementary materials.**

520

521 **Materials and Methods**

522

523 **Chimeric spike vaccine design and formulation**

524 Chimeric spike vaccines were designed with RBD and NTD swaps to increase coverage  
525 of epidemic (SARS-CoV), pandemic (SARS-CoV-2), and high-risk pre-emergent bat CoVs (bat  
526 SARS-like HKU3-1, and bat SARS-like RsSHC014). Chimeric and monovalent spike mRNA-  
527 LNP vaccines were designed based on SARS-CoV-2 spike (S) protein sequence (Wuhan-Hu-1,  
528 GenBank: MN908947.3), SARS-CoV (urbani GenBank: AY278741), bat SARS-like CoV  
529 HKU3-1 (GenBank: DQ022305), and Bat SARS-like RsSHC014 (GenBank: KC881005).  
530 Coding sequences of full-length SARS-CoV-2 furin knockout (RRAR furin cleavage site  
531 abolished between amino acids 682-685), the four chimeric spikes, and the norovirus capsid  
532 negative control were codon-optimized, synthesized and cloned into the mRNA production  
533 plasmid mRNAs were encapsulated with LNP (41). Briefly, mRNAs were transcribed to contain  
534 101 nucleotide-long poly(A) tails. mRNAs were modified with m<sup>1</sup>Ψ-5'-triphosphate (TriLink  
535 #N-1081) instead of UTP and the *in vitro* transcribed mRNAs capped using the trinucleotide  
536 cap1 analog, CleanCap (TriLink #N-7413). mRNA was purified by cellulose (Sigma-Aldrich #  
537 11363-250G) purification. All mRNAs were analyzed by agarose gel electrophoresis and were  
538 stored at -20°C. Cellulose-purified m<sup>1</sup>Ψ-containing RNAs were encapsulated in proprietary  
539 LNPs containing adjuvant (Acuitas) using a self-assembly process as previously described  
540 wherein an ethanolic lipid mixture of ionizable cationic lipid, phosphatidylcholine, cholesterol  
541 and polyethylene glycol-lipid was rapidly mixed with an aqueous solution containing mRNA at

542 acidic pH. The RNA-loaded particles were characterized and subsequently stored at  $-80^{\circ}\text{C}$  at a  
543 concentration of 1 mg/ml. The mean hydrodynamic diameter of these mRNA-LNP was  $\sim 80$  nm  
544 with a polydispersity index of 0.02-0.06 and an encapsulation efficiency of  $\sim 95\%$ .

545

#### 546 **Animals, immunizations, and challenge viruses**

547 Eleven-month-old female BALB/c mice were purchased from Envigo (#047) and were  
548 used for all experiments. The study was carried out in accordance with the recommendations for  
549 care and use of animals by the Office of Laboratory Animal Welfare (OLAW), National  
550 Institutes of Health and the Institutional Animal Care and Use Committee (IACUC) of  
551 University of North Carolina (UNC permit no. A-3410-01). mRNA-LNP vaccines were kept  
552 frozen until right before the vaccination. Mice were immunized with a total  $1\mu\text{g}$  in the prime and  
553 boost. Briefly, chimeric vaccines were mixed at 1:1 ratio for a total of  $1\mu\text{g}$  when more than one  
554 chimeric spike was used or  $1\mu\text{g}$  of a single spike diluted in sterile 1XPBS in a  $50\mu\text{l}$  volume and  
555 were given  $25\mu\text{l}$  intramuscularly in each hind leg. Prime and boost immunizations were given  
556 three weeks apart. Three weeks post boost, mice were bled, sera was collected for analysis, and  
557 mice were moved into the BSL3 facility for challenge experiments. Animals were housed in  
558 groups of five and fed standard chow diets. Virus inoculations were performed under anesthesia  
559 and all efforts were made to minimize animal suffering. All mice were anesthetized and infected  
560 intranasally with  $1 \times 10^4$  PFU/ml of SARS-CoV MA15,  $1 \times 10^4$  PFU/ml of SARS-CoV-2 MA10,  
561  $1 \times 10^4$  PFU/ml RsSHC014,  $1 \times 10^4$  PFU/ml RsSHC014-MA15,  $1 \times 10^5$  PFU/ml WIV-1, and  $1 \times$   
562  $10^4$  PFU/ml SARS-CoV-2 B.1.351-MA10 which have been described previously (8, 42, 43).  
563 Mice were weighted daily and monitored for signs of clinical disease. Each challenge virus  
564 challenge experiment encompassed 50 mice with 10 mice per vaccine group to obtain statistical

565 power. Mouse vaccinations and challenge experiments were independently repeated twice to  
566 ensure reproducibility.

567

### 568 **Measurement of mouse CoV spike binding antibodies by ELISA**

569 Mouse serum samples from pre-immunization (pre-prime), 2 weeks post prime (pre-  
570 boost), and 3 weeks post boost were tested. A binding ELISA panel that included SARS-CoV  
571 spike Protein Delta<sup>TM</sup>, SARS-CoV-2 (2019-nCoV) spike Protein (S1+S2 ECD, His tag),  
572 MERS-CoV, Coronavirus spike S1+S2 (Baculovirus-Insect Cells, His), HKU1 (isolate N5) spike  
573 Protein (S1+S2 ECD, His Tag), OC43 spike Protein (S1+S2 ECD, His Tag), 229E spike Protein  
574 (S1+S2 ECD, His tag) Human coronavirus (HCoV-NL63) spike Protein (S1+S2 ECD, His Tag),  
575 Pangolin CoV\_GXP4L\_spikeEcto2P\_3C8HtS2/293F, bat CoV  
576 RsSHC014\_spikeEcto2P\_3C8HtS2/293F, RaTG13\_spikeEcto2P\_3C8HtS2/293F, and bat CoV  
577 HKU3-1 spike were tested. Indirect binding ELISAs were conducted in 384 well ELISA plates  
578 (Costar #3700) coated with 2µg/ml antigen in 0.1M sodium bicarbonate overnight at 4°C,  
579 washed and blocked with assay diluent (1XPBS containing 4% (w/v) whey protein/ 15% Normal  
580 Goat Serum/ 0.5% Tween-20/ 0.05% Sodium Azide). Serum samples were incubated for 60  
581 minutes in three-fold serial dilutions beginning at 1:30 followed by washing with PBS/0.1%  
582 Tween-20. HRP conjugated goat anti-mouse IgG secondary antibody (SouthernBiotech 1030-05)  
583 was diluted to 1:10,000 in assay diluent without azide, incubated at for 1 hour at room  
584 temperature, washed and detected with 20µl SureBlue Reserve (KPL 53-00-03) for 15 minutes.  
585 Reactions were stopped via the addition of 20µl HCL stop solution. Plates were read at 450nm.  
586 Area under the curve (AUC) measurements were determined from binding of serial dilutions.  
587

588 **ACE2 blocking ELISAs.**

589           Plates were coated with 2 $\mu$ g/ml recombinant ACE2 protein, then washed and blocked  
590 with 3% BSA in PBS. While assay plates blocked, and sera was diluted 1:25 in 1% BSA/0.05%  
591 Tween-20. Then SARS-CoV-2 spike protein was mixed with equal volumes of each sample at a  
592 final spike concentration equal to the EC<sub>50</sub> at which it binds to ACE2. The mixture was allowed  
593 to incubate at room temperature for 1 hour. Blocked assay plates were washed, and the serum-  
594 spike mixture was added to the assay plates for a period of 1 hour at room temperature. Plates  
595 were washed and Strep-Tactin HRP, (IBA GmbH, Cat# 2-1502-001) was added at a dilution of  
596 1:5000 followed by TMB substrate. The extent to which antibodies were able to block the  
597 binding of spike protein to ACE2 was determined by comparing the OD of antibody samples at  
598 450nm to the OD of samples containing spike protein only with no antibody. The following  
599 formula was used to calculate percent blocking  $(100 - (\text{OD sample} / \text{OD of spike only}) * 100)$ .

600

601 **Measurement of neutralizing antibodies against live viruses**

602           Full-length SARS-CoV-2 Seattle, SARS-CoV-2 D614G, SARS-CoV-2 B.1.351, SARS-  
603 CoV-2 B.1.1.7, SARS-CoV-2 mink, SARS-CoV, WIV-1, and RsSHC014 viruses were designed  
604 to express nanoluciferase (nLuc) and were recovered via reverse genetics as described previously  
605 (29). Virus titers were measured in Vero E6 USAMRIID cells, as defined by plaque forming  
606 units (PFU) per ml, in a 6-well plate format in quadruplicate biological replicates for accuracy.  
607 For the 96-well neutralization assay, Vero E6 USAMRID cells were plated at 20,000 cells per  
608 well the day prior in clear bottom black walled plates. Cells were inspected to ensure confluency  
609 on the day of assay. Serum samples were tested at a starting dilution of 1:20 and were serially  
610 diluted 3-fold up to nine dilution spots. Serially diluted serum samples were mixed in equal

611 volume with diluted virus. Antibody-virus and virus only mixtures were then incubated at 37°C  
612 with 5% CO<sub>2</sub> for one hour. Following incubation, serially diluted sera and virus only controls  
613 were added in duplicate to the cells at 75 PFU at 37°C with 5% CO<sub>2</sub>. After 24 hours, cells were  
614 lysed, and luciferase activity was measured via Nano-Glo Luciferase Assay System (Promega)  
615 according to the manufacturer specifications. Luminescence was measured by a Spectramax M3  
616 plate reader (Molecular Devices, San Jose, CA). Virus neutralization titers were defined as the  
617 sample dilution at which a 50% reduction in RLU was observed relative to the average of the  
618 virus control wells.

619

### 620 **Eosinophilic lung infiltrates staining**

621 To detect eosinophils, chromogenic immunohistochemistry (IHC) was performed on paraffin-  
622 embedded lung tissues that were sectioned at 4 microns. Lung tissues from vaccine groups 1-5  
623 were analyzed for lung eosinophilic infiltration. N=8-10 lung tissues per group were analyzed.  
624 This IHC was carried out using the Leica Bond III Autostainer system. Slides were dewaxed in  
625 Bond Dewax solution (AR9222) and hydrated in Bond Wash solution (AR9590). Heat induced  
626 antigen retrieval was performed for 20 min at 100°C in Bond-Epitope Retrieval solution 2, pH-  
627 9.0 (AR9640). After pretreatment, slides were incubated with an Eosinophil Peroxidase antibody  
628 (PA5-62200, Invitrogen) at 1:1,000 for 1h followed with Novolink Polymer (RE7260-K)  
629 secondary. Antibody detection with 3,3'-diaminobenzidine (DAB) was performed using the  
630 Bond Intense R detection system (DS9263). Stained slides were dehydrated and coverslipped  
631 with Cytoseal 60 (8310-4, Thermo Fisher Scientific). Two positive controls (one with high and  
632 another with low eosinophil reactivity) and a negative control (no primary antibody) were  
633 included in all staining runs.

634

### 635 **Lung pathology scoring**

636 Acute lung injury was quantified via two separate lung pathology scoring scales: Matute-  
637 Bello and Diffuse Alveolar Damage (DAD) scoring systems. Analyses and scoring were  
638 performed by a board verified veterinary pathologist who was blinded to the treatment groups as  
639 described previously (30). Lung pathology slides were read and scored at 600X total  
640 magnification.

641 The lung injury scoring system used is from the American Thoracic Society (Matute-  
642 Bello) in order to help quantitate histological features of ALI observed in mouse models to relate  
643 this injury to human settings. In a blinded manner, three random fields of lung tissue were  
644 chosen and scored for the following: (A) neutrophils in the alveolar space (none = 0, 1–5 cells =  
645 1, > 5 cells = 2), (B) neutrophils in the interstitial septa (none = 0, 1–5 cells = 1, > 5 cells = 2),  
646 (C) hyaline membranes (none = 0, one membrane = 1, > 1 membrane = 2), (D) Proteinaceous  
647 debris in air spaces (none = 0, one instance = 1, > 1 instance = 2), (E) alveolar septal thickening  
648 (< 2x mock thickness = 0, 2–4x mock thickness = 1, > 4x mock thickness = 2). To obtain a lung  
649 injury score per field, A–E scores were put into the following formula  $\text{score} = [(20 \times A) + (14 \times$   
650  $B) + (7 \times C) + (7 \times D) + (2 \times E)]/100$ . This formula contains multipliers that assign varying  
651 levels of importance for each phenotype of the disease state. The scores for the three fields per  
652 mouse were averaged to obtain a final score ranging from 0 to and including 1.

653 The second histology scoring scale to quantify acute lung injury was adopted from a lung  
654 pathology scoring system from lung RSV infection in mice (31). This lung histology scoring  
655 scale measures diffuse alveolar damage (DAD). Similar to the implementation of the ATS  
656 histology scoring scale, three random fields of lung tissue were scored for the following in a

657 blinded manner: 1= absence of cellular sloughing and necrosis, 2=Uncommon solitary cell  
658 sloughing and necrosis (1–2 foci/field), 3=multifocal (3+foci) cellular sloughing and necrosis  
659 with uncommon septal wall hyalinization, or 4=multifocal (>75% of field) cellular sloughing  
660 and necrosis with common and/or prominent hyaline membranes. The scores for the three fields  
661 per mouse were averaged to get a final DAD score per mouse. The microscope images were  
662 generated using an Olympus Bx43 light microscope and CellSense Entry v3.1 software.

663

#### 664 **Measurement of lung cytokines**

665 Lung tissue was homogenized, spun down at 13,000g, and supernatant was used to  
666 measure lung cytokines using Mouse Cytokine 23-plex Assay (BioRad). Briefly, 50µl of lung  
667 homogenate supernatant was added to each well and the protocol was followed according to the  
668 manufacturer specifications. Plates were read using a MAGPIX multiplex reader (Luminex  
669 Corporation).

670

#### 671 **Biocontainment and biosafety**

672 Studies were approved by the UNC Institutional Biosafety Committee approved by  
673 animal and experimental protocols in the Baric laboratory. All work described here was  
674 performed with approved standard operating procedures for SARS-CoV-2 in a biosafety level 3  
675 (BSL-3) facility conforming to requirements recommended in the Microbiological and  
676 Biomedical Laboratories, by the U.S. Department of Health and Human Service, the U.S. Public  
677 Health Service, and the U.S. Center for Disease Control and Prevention (CDC), and the National  
678 Institutes of Health (NIH).

679

680 **Statistics**

681 All statistical analyses were performed using GraphPad Prism 9. Statistical tests used in  
682 each figure are denoted in the corresponding figure legend.

683

684

685

686

687

688

689

690

691

692

693

694

695

696

697

698

699

700

701

702



703 **Figure S1. Chimeric and wild type spike Sarbecovirus constructs.**

704 (A) Mouse vaccination strategy using mRNA-LNPs: group 1 received chimeric spike 1, 2, 3, and  
705 4 as the prime and boost, group 2 received chimeric spike 1, 2 as the prime and chimeric spikes 3  
706 and 4 as the boost, group 3 received chimeric spike 4 as the prime and boost, group 4 received  
707 SARS-CoV-2 furin KO prime and boost, and group 5 received a norovirus capsid prime and  
708 boost. Different vaccine groups were separately challenged with 1) SARS-CoV MA15, 2)  
709 SARS-CoV-2 MA10, 3) RsSHC014 full-length virus, 4) RsSHC014-MA15, 5) WIV-1, and 6)  
710 SARS-CoV-2 B.1.351 MA10. (B) Protein expression of chimeric spikes, SARS-CoV-2 furin  
711 KO, and norovirus mRNA vaccines. The extra band between 100-150 kDa corresponds to S1.  
712 GAPDH was used as the loading control. (C) Nanoluciferase expression of RsSHC014/SARS-  
713 CoV-2 chimeric spike live viruses.

714

715 **Figure S2. Human common-cold CoV ELISA binding responses in chimeric and**

716 **monovalent SARS-CoV-2 spike mRNA-LNP-vaccinated mice.** Pre-immunization, post prime,  
717 and post boost binding to (A) HCoV-HKU1 spike, (B) HCoV-OC43 spike, (C) HCoV-229E  
718 spike, and (D) HCoV-NL63 spike. Statistical significance for the binding and blocking responses  
719 is reported from a Kruskal-Wallis test after Dunnett's multiple comparison correction. \* $p <$   
720  $0.05$ , \*\* $p < 0.01$ , \*\*\* $p < 0.001$ , and \*\*\*\* $p < 0.0001$ .

721

722 **Figure S3. Comparison of neutralizing antibody activity of CoV mRNA-LNP vaccines**

723 **against Sarbecoviruses.** (A) Group 1 neutralizing antibody responses against SARS-CoV-2,  
724 SARS-CoV, RsSHC014, and WIV-1 and (B) fold-change of SARS-CoV, RsSHC014, and WIV-  
725 1 neutralizing antibodies relative to SARS-CoV-2. (C) Group 2 neutralizing antibody responses

726 against SARS-CoV-2, SARS-CoV, RsSHC014, and WIV-1 and **(D)** fold-change of SARS-CoV,  
727 RsSHC014, and WIV-1 neutralizing antibodies relative to SARS-CoV-2. **(E)** Group 3  
728 neutralizing antibody responses against SARS-CoV-2, SARS-CoV, RsSHC014, and WIV-1 and  
729 **(F)** fold-change of SARS-CoV, RsSHC014, and WIV-1 neutralizing antibodies relative to  
730 SARS-CoV-2. **(G)** Group 4 neutralizing antibody responses against SARS-CoV-2, SARS-CoV,  
731 RsSHC014, and WIV-1 and **(H)** fold-change of SARS-CoV, RsSHC014, and WIV-1  
732 neutralizing antibodies relative to SARS-CoV-2.

733

734 **Figure S4. *In vivo* protection against Bt-CoV challenge by chimeric spikes mRNA-vaccines.**

735 **(A)** Percent starting weight from the different vaccine groups of mice challenged with full-length  
736 RsSHC014. **(B)** RsSHC014 lung viral titers in mice from the distinct vaccine groups. **(C)**  
737 RsSHC014 nasal turbinate titers in mice from the different immunization groups. **(D)** Percent  
738 starting weight from the different vaccine groups of mice challenged with RsSHC014-MA15.  
739 **(E)** RsSHC014-MA15 lung viral titers in mice from the distinct vaccine groups. **(F)** RsSHC014-  
740 MA15 nasal turbinate titers in mice from the different immunization groups. Statistical  
741 significance is reported from a one-way ANOVA after Tukey's multiple comparison correction.  
742 \* $p < 0.05$ , \*\* $p < 0.01$ , \*\*\* $p < 0.001$ , and \*\*\*\* $p < 0.0001$ .

743

744 **Figure S5. Survival analysis of immunized mice challenged with Sarbecoviruses. (A)**

745 Survival analysis at day 4 post infection from immunized mice infected with SARS-CoV MA15,  
746 **(B)** SARS-CoV-2 MA10, **(C)** Survival analysis at day 7 post infection from immunized mice  
747 infected with SARS-CoV-2 MA10, and **(D)** RsSHC014-MA15. Statistical significance is  
748 reported from a Mantel-Cox test.

749

750 **Figure S6. Detection of eosinophilic infiltrates in SARS-CoV MA15 challenged mice.**

751 (A) Group 1: rare scattered individual eosinophils in the interstitium with some small  
752 perivascular cuffs that lack eosinophils. (B) Group 2: Bronchiolar cuffs of leukocytes with rare  
753 eosinophils. (C) Group 3: Hyperplastic bronchus-associated lymphoid tissue (BALT) with rare  
754 eosinophils. (D) Group 4: frequent perivascular cuffs that contain eosinophils. (E) Group 5:  
755 frequent eosinophils in perivascular cuffs.

756

757 **Figure S7. Lung cytokine analysis in Sarbecovirus-challenged mice.** CCL2, IL-1 $\alpha$ , G-SCF,  
758 and CCL4 in (A) SARS-CoV-infected mice and in (B) SARS-CoV-2-infected mice. Statistical  
759 significance for the binding and blocking responses is reported from a Kruskal-Wallis test after  
760 Dunnett's multiple comparison correction. \*p < 0.05, \*\*p < 0.01, \*\*\*p < 0.001, and \*\*\*\*p < 0.0001.

761

762 **Table S1: Amino acid sequences of chimeric spikes.**

763

## Figure S1

A

Immunization strategy and challenge viruses in the different vaccine groups.

| Vaccination group | Day 0 prime               | Day 21 boost              | Day 55 post prime challenge viruses                                                                           |
|-------------------|---------------------------|---------------------------|---------------------------------------------------------------------------------------------------------------|
| Group 1           | Chimera 1, 2, 3, 4        | Chimera 1, 2, 3, 4        | 1) SARS-CoV MA15, 2) SARS-CoV-2 MA10<br>3) RsSHC014, 4) RsSHC014-MA15<br>5) WIV-1, 6) SARS-CoV-2 B.1.351-MA10 |
| Group 2           | Chimera 1, 2              | Chimera 3, 4              | 1) SARS-CoV MA15, 2) SARS-CoV-2 MA10<br>3) RsSHC014, 4) RsSHC014-MA15<br>5) WIV-1, 6) SARS-CoV-2 B.1.351-MA10 |
| Group 3           | Chimera 4                 | Chimera 4                 | 1) SARS-CoV MA15, 2) SARS-CoV-2 MA10<br>3) RsSHC014, 4) RsSHC014-MA15<br>5) WIV-1, 6) SARS-CoV-2 B.1.351-MA10 |
| Group 4           | SARS-CoV-2 furin knockout | SARS-CoV-2 furin knockout | 1) SARS-CoV MA15, 2) SARS-CoV-2 MA10<br>3) RsSHC014, 4) RsSHC014-MA15<br>5) WIV-1, 6) SARS-CoV-2 B.1.351-MA10 |
| Group 5           | Norovirus capsid          | Norovirus capsid          | 1) SARS-CoV MA15, 2) SARS-CoV-2 MA10<br>3) RsSHC014, 4) RsSHC014-MA15<br>5) WIV-1, 6) SARS-CoV-2 B.1.351-MA10 |

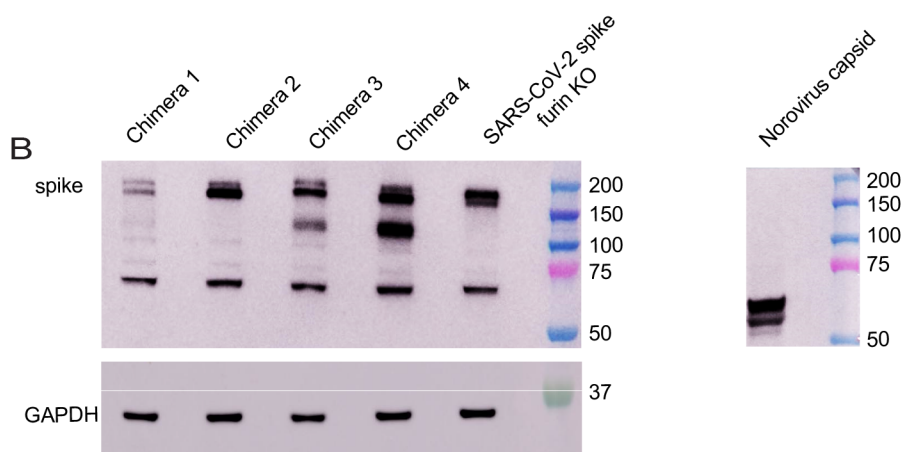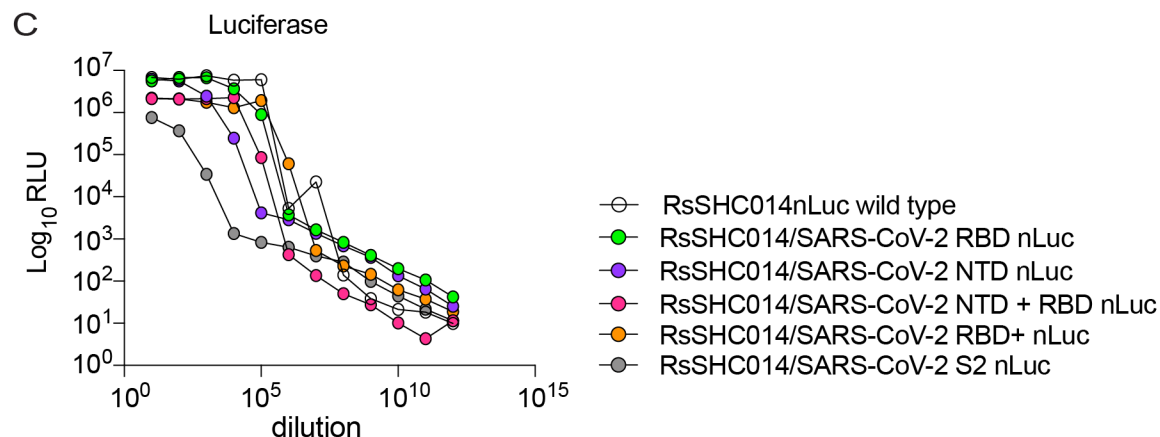

Figure S2

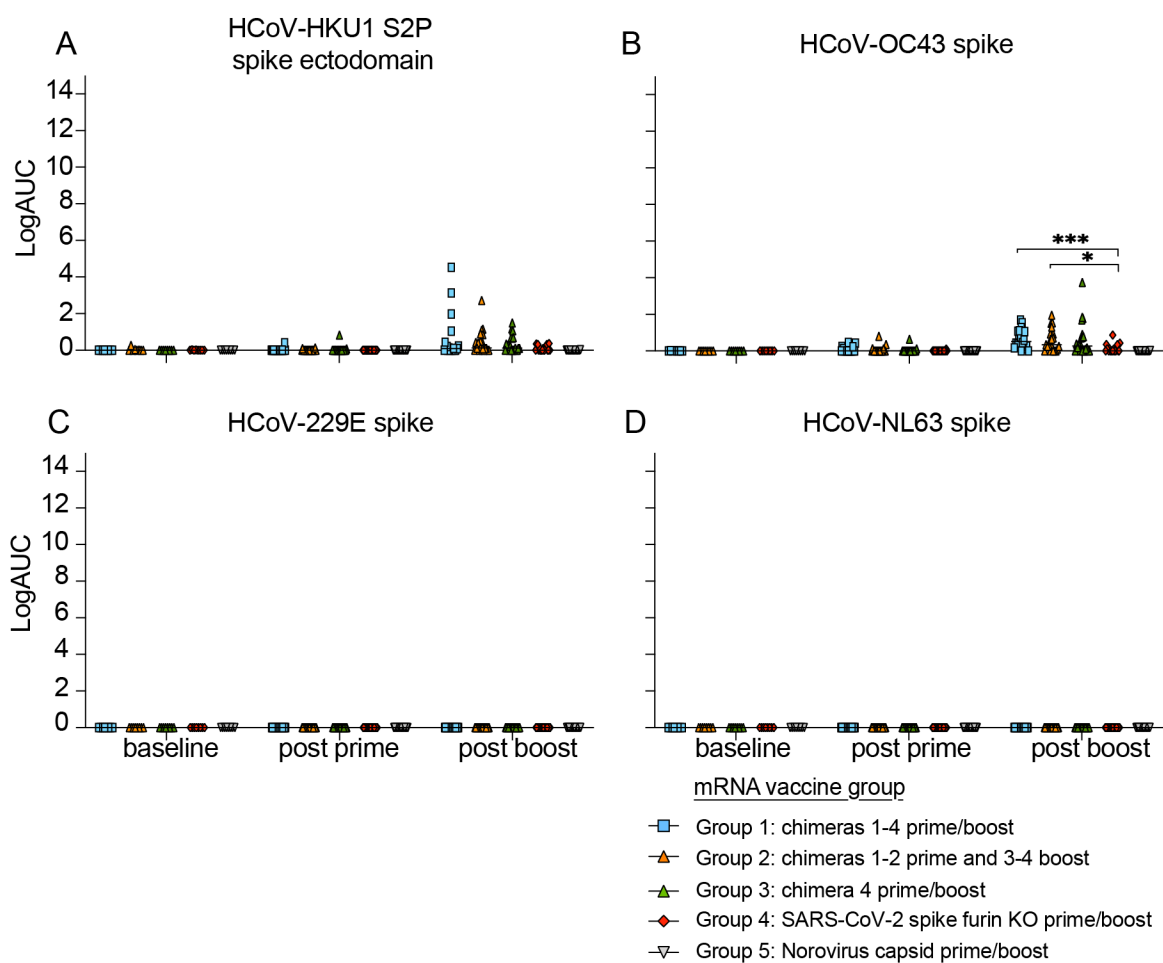

Figure S3

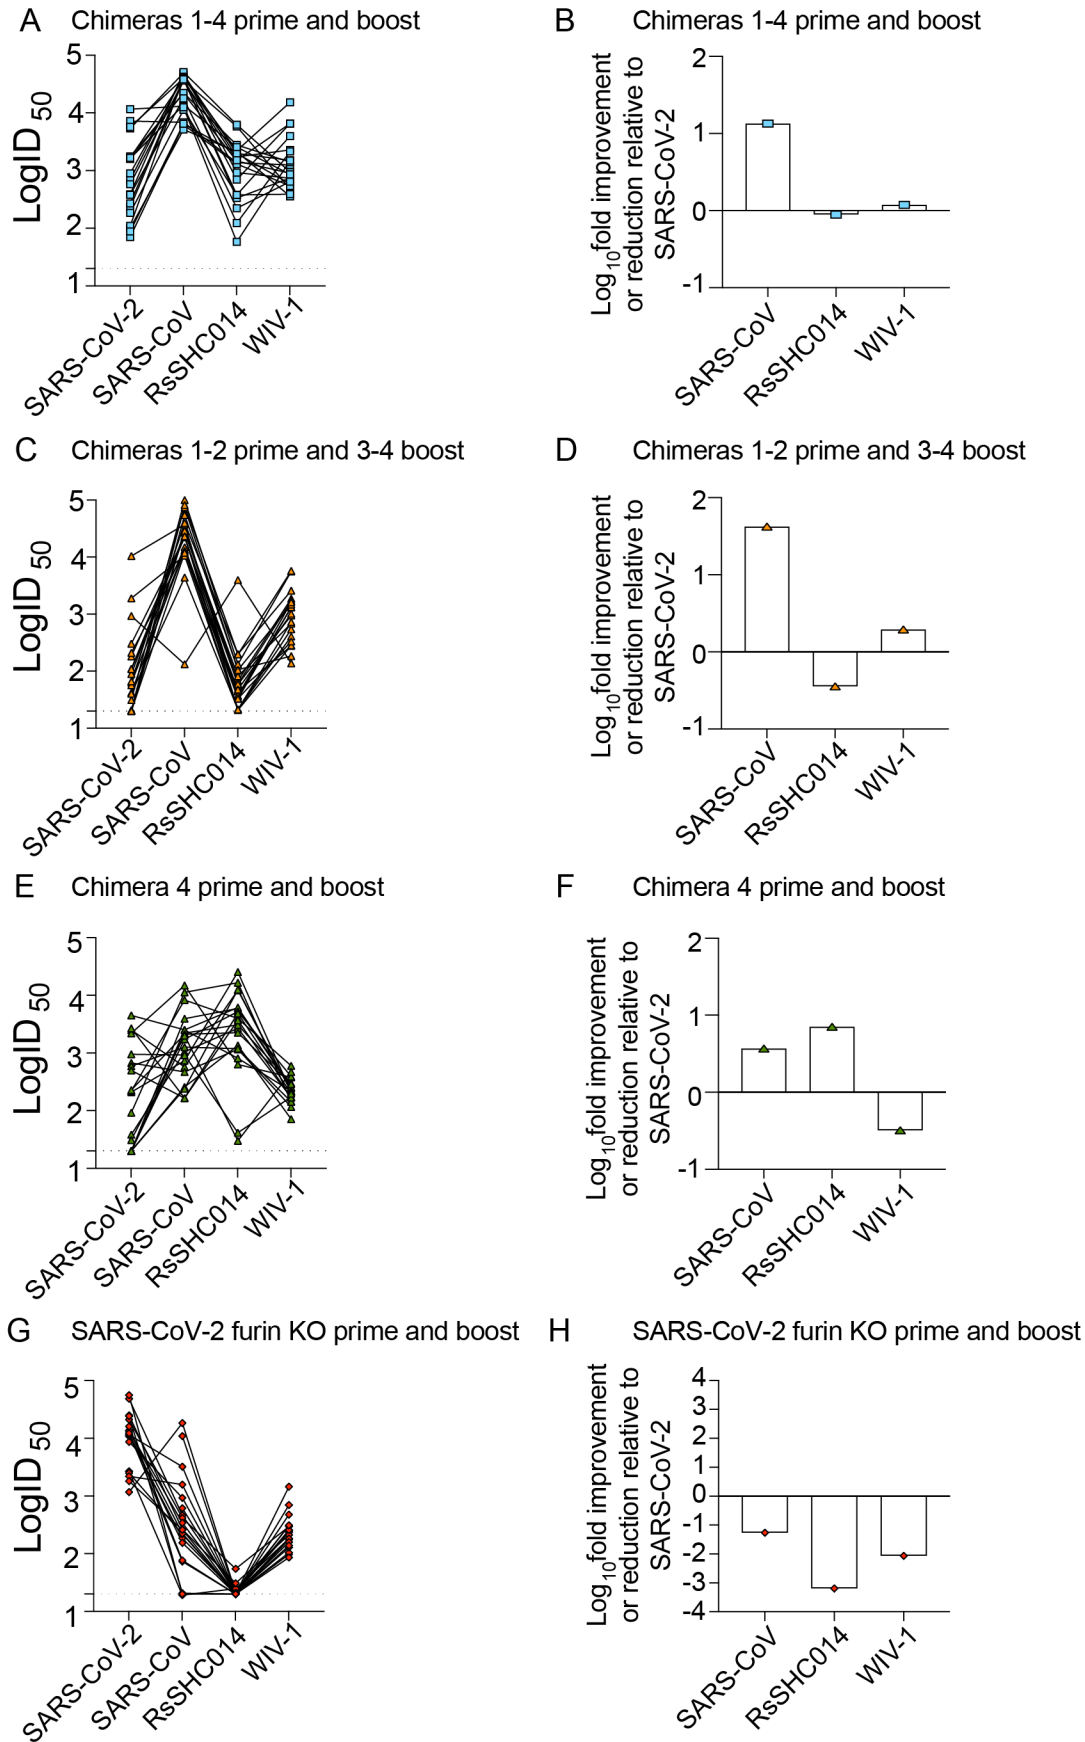

Figure S4

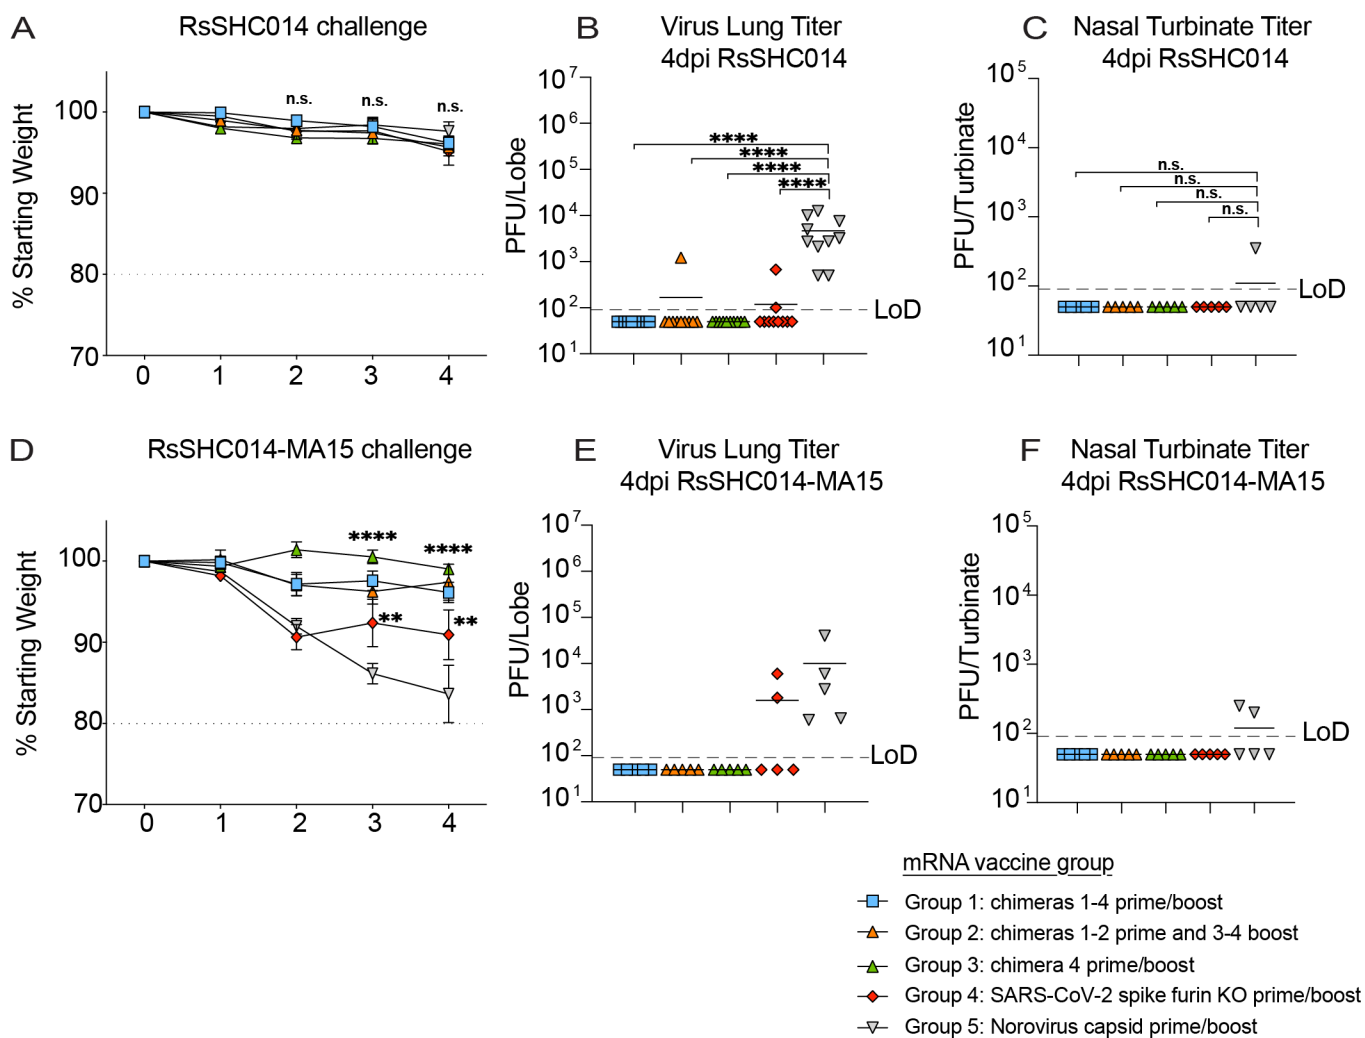

Figure S5

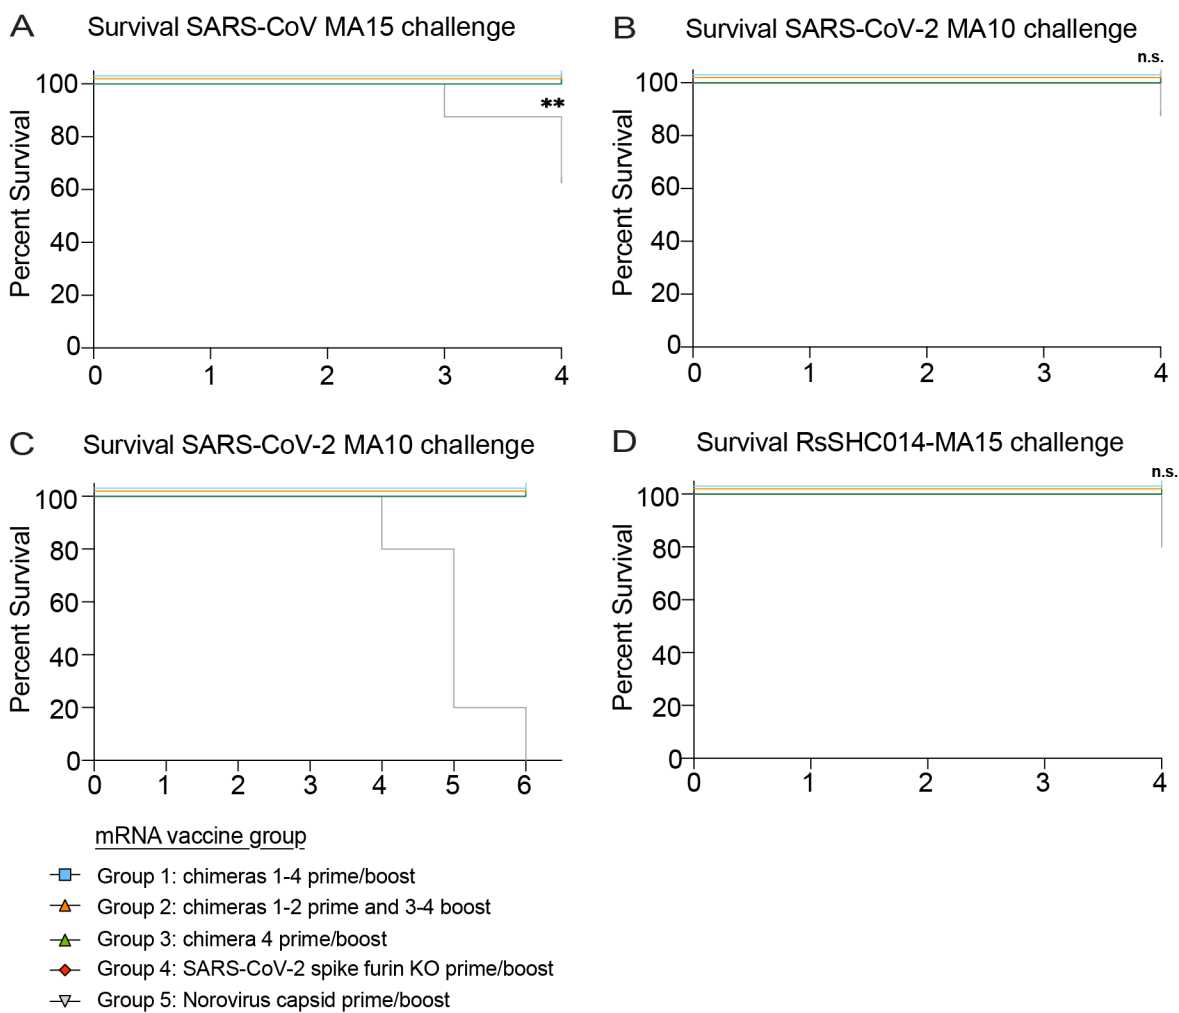



Figure S6

SARS-CoV challenge

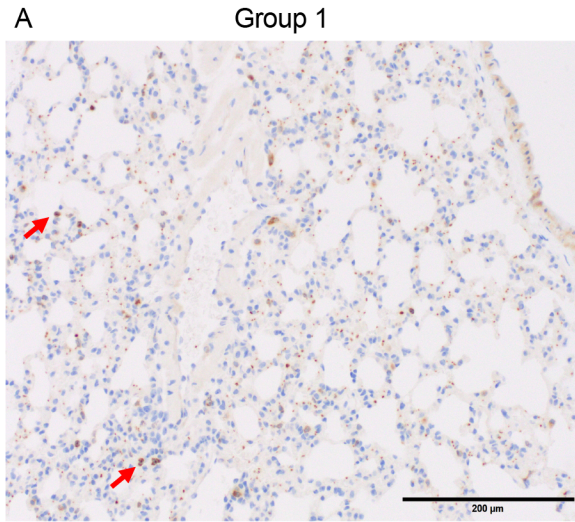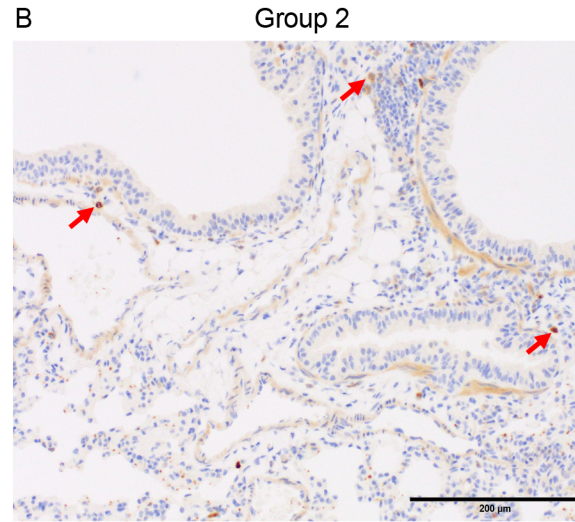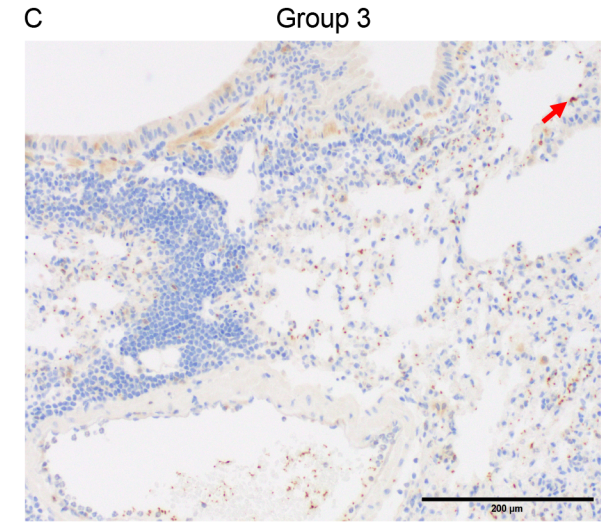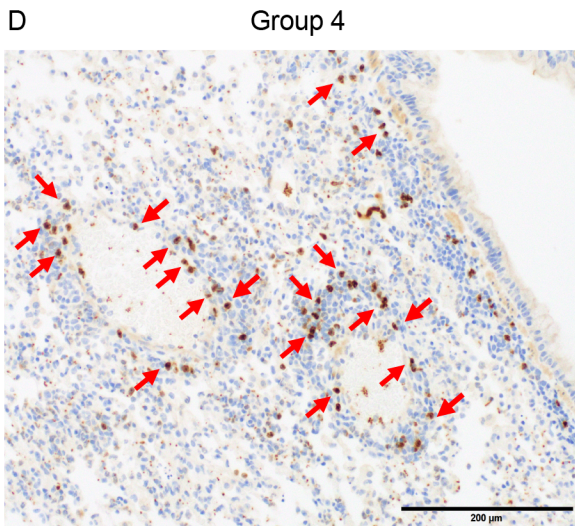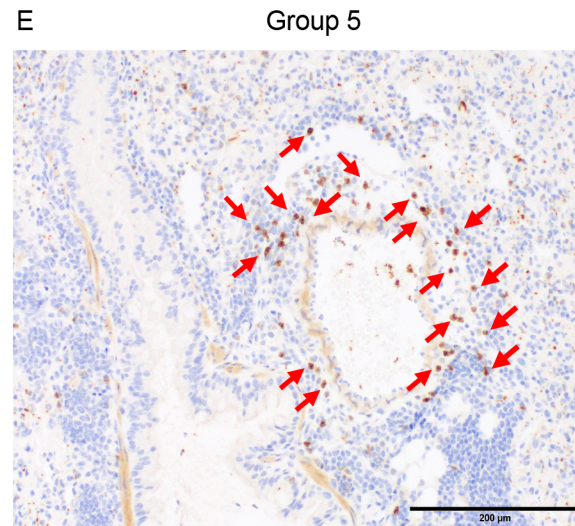

- mRNA vaccine group
- Group 1: chimeras 1-4 prime/boost
  - ▲ Group 2: chimeras 1-2 prime and 3-4 boost
  - ▲ Group 3: chimera 4 prime/boost
  - ◆ Group 4: SARS-CoV-2 spike furin KO prime/boost
  - ▽ Group 5: Norovirus capsid prime/boost

Figure S7

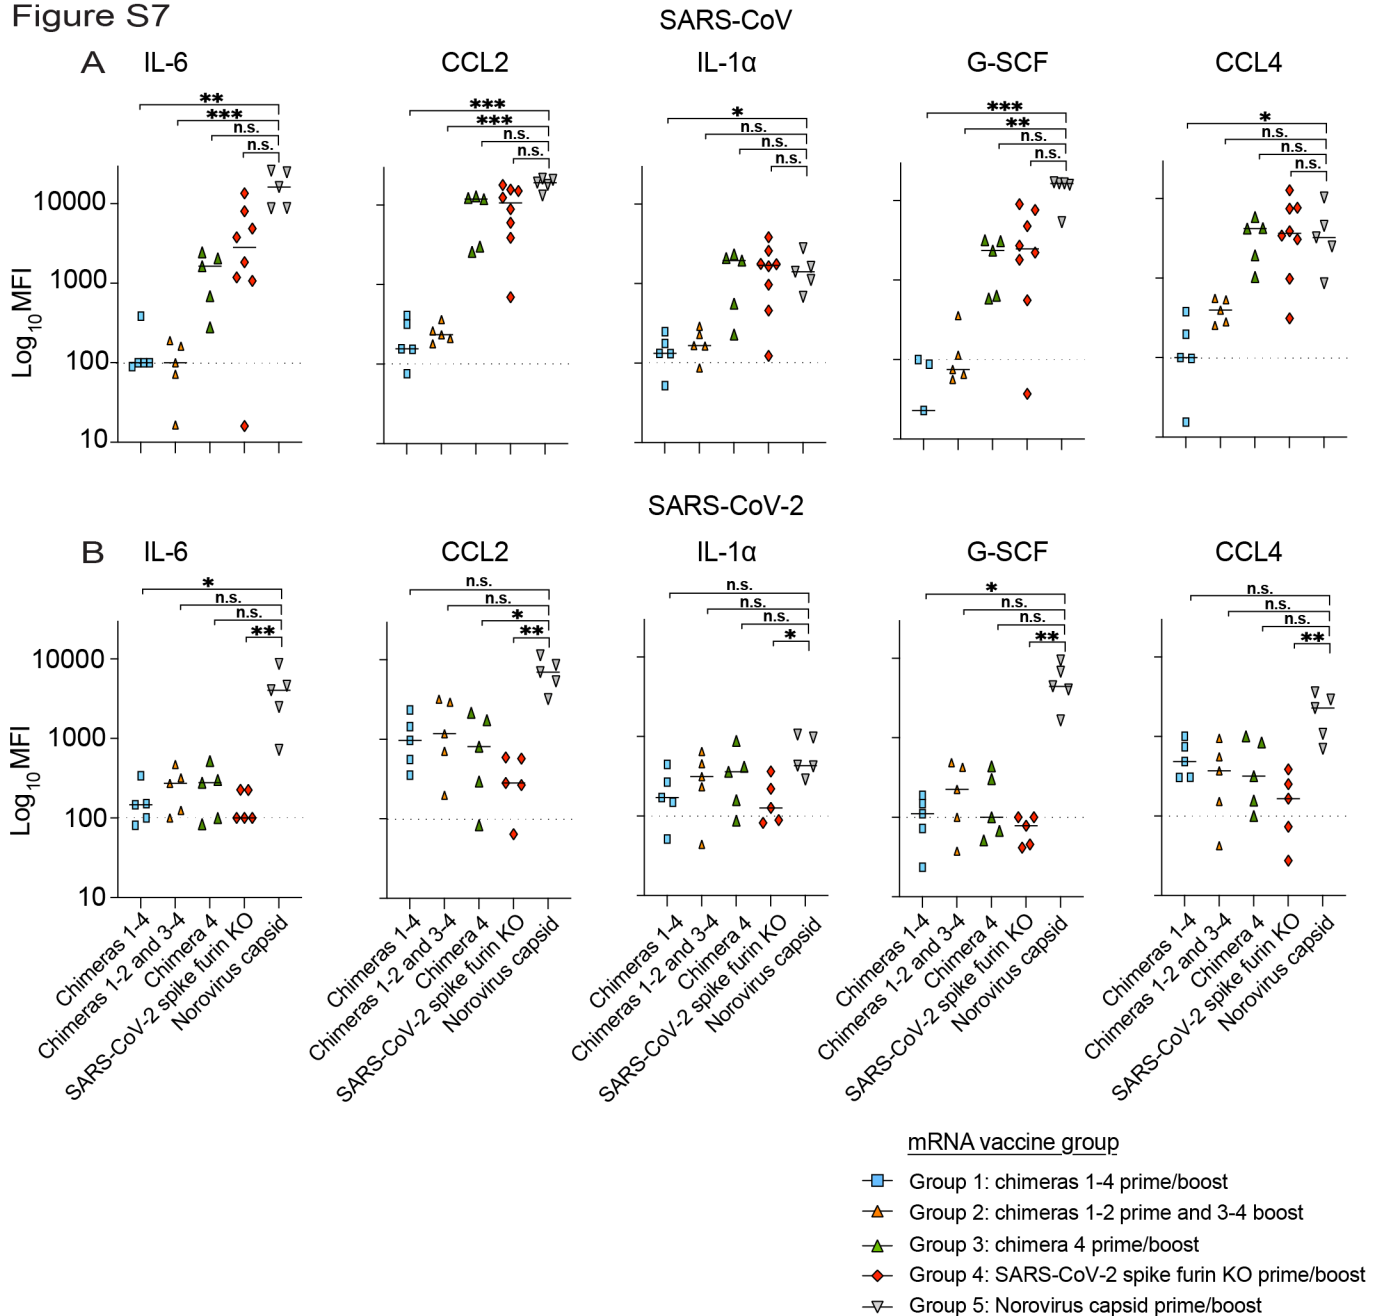

**Table S1: Amino acid sequences of chimeric spikes**

|            |                                                                                                                                                                                                                                                                                                                                                                                                                                                                                                                                                                                                                                                                                                                                                                                                                                                                                                                                                                                                                                                                                                                                                                                                                                                                                                                                                                       |
|------------|-----------------------------------------------------------------------------------------------------------------------------------------------------------------------------------------------------------------------------------------------------------------------------------------------------------------------------------------------------------------------------------------------------------------------------------------------------------------------------------------------------------------------------------------------------------------------------------------------------------------------------------------------------------------------------------------------------------------------------------------------------------------------------------------------------------------------------------------------------------------------------------------------------------------------------------------------------------------------------------------------------------------------------------------------------------------------------------------------------------------------------------------------------------------------------------------------------------------------------------------------------------------------------------------------------------------------------------------------------------------------|
| Chimera 1: | MFVFLVLLPLVSSQCGHISRPQPKMAQVSSSRGGVYYNDDIFRSDVHLHTQDYFLPFDSNLTQYFSLNVSDRYTYFD<br>NPILDFGDGVYFAATEKSNVIRGWIFGSSFDNTTQSAVIVNNSTHIIIRVCNFNLCKEPMYTVSRGTQQNAWVYQSAFN<br>CTYDRVEKSFQLDTPKTGNFKDLREYVFKNRDGFLLSVYQTYTAVNLRGLPTGFSVLKPKILKLPFGINITSYRVVMA<br>MFSQTTSNFLPESAAYYVGNLKYSTFMLRFNENGTITDAVDCSQNPLAELKCTIKNFTVEKGIYQTSNFRVQPTESIVR<br>FPNITNLCPFGEVFNATKFPVYAWERKKISNCVADYSVLYNSTFFSTFKCYGVSATKLNLDLCSFNVYADSFVVKGDD<br>VRQIAPGQTVIADYNYKLPDDFMGCVLAWNTRNIDATSTGNYNKYRYLRHGKLRPFERDISNVFSPDGKPCPPA<br>LNCYWPLNDYGVFTTIGIGYQPYRVVLSFELLNAPATVCGPKKSTNLVKNKCVNFNFNGLTGTGVLTESNKKFLPF<br>QQFGRDIADTTDAVRDPQTEILELDITPCSFGGVSVITPGTNTSNQVAVLYQDVNCTEVPVAIHADQLTPTWRVYSTGNS<br>VFQTRAGCLIGAHEVNNSYECDIPIGAGICASYQTQNSPRRARSVASQSIIAYTMSLGAENSVAYSNNNSIAIPTNFTISV<br>TTEILPVSMTKTSVDCTMYICGDSTECSNLLQYGSFCTQLNRALTGIAVEQDKNTQEVFAQVKQIYKTPPIKDFGGFN<br>FSQILPDPSPKPSKRSFIEDLLFNKVTLDAGFIKQYGDCLGDIARDLCAQKFNGLTVLPPLLTDemiaQYTSALLAGT<br>ITSGWTFGAGAALQIPFAMQMAFRFNGIGVTQNVLYENQKLIANQFNSAIGKIQDLSSTASALGKLQDVVNQNAQAL<br>NTLVKQLSSNFGAISSVNLNDILSRLDKVEAEVQIDRLITGRLQSLQTYVTQQLIRAAEIRASANLAATKMSECVLGQSK<br>RVDFCGKGYHLMSPFQSAHPGVVFLHVTVYVPAQEKNTTAPAICHGDKAHFPREGVVFVSNGTHWVFTQRNFYEPQIIT<br>TDNTFVSGNCDVVIIGNNTVYDPLQPELDSFKEELDKEYFKNHTSPDVLDGDISGINASVVNIQKEIDRLNEVAKNLESIDL<br>SLIDLQELGKYEYQIKWPWYIWLGFIAGLIAIVMVTIMLCCMTSCCSCLKGCCSCGSCCKFDEDDSEPVKGVKLVHYT    |
| Chimera 2: | MFIFLLFLTLSGSDLRCTTFDDVQAPNYTQHTSSMRGVYYPDEIFRSDTLYLTQDLFLPFYSNVTGFHTINHTFGNP<br>VIPFKDGIYFAATEKSNVVRGWVFGSTMNKSQSIVIIINNTNVIRACNFELCDNPFVAVSKPMGTQHTMIFDNAFN<br>CTFEYISDAFSLDVSEKSGNFKHLREFVFNKDGFLYVYKGYQPIDVVRDLPSGFNTLKPIFKLPLGINITNFRAILTAFS<br>PAQDIWGTSAAYYFVGYLKPTTFMLKYDENGITITDAVDCSQNPLAELKCSVKSFEIDKGIYQTSNFRVVPDGVVRF<br>NITNLCPFGEVFNATRFASVYAANRRKRISNCVADYSVLYNSASFSTFKCYGVSPTKLNLDLCTNRYADSFVIRGDEV<br>QIAPGQTKIADYNYKLPDDFTGCVIAWNSNLDKSVGGNYNYLYRFRKSNLKPFFERDISTEYIYQAGSTPCNGVEGF<br>NCYFPLQSYGFQPTNGVGYQPYRVVLSFELLHAPATVCGPKLSTDLIKNQCVNFNFNGLTGTGVLTPSSKRFQPFQ<br>FGRDVSDFDTSVRDPKTEILELDISPCSFGGVSVITPGTNASSEVAVLYQDVNCTDVSTAIHADQLTPAWRIYSTGNNV<br>TQAGCLIGAHEVNTSYECDIPIGAGICASYHTVSLLRSTSQKSIVAYTMSLGAENSVAYSNNNSIAIPTNFSISITTEVMPV<br>SMAKTSVDCNMYICGDSTECANLLQYGSFCTQLNRALSGIAAEQDRNTREVFAQVKQMYKTPTLKYFGGFNFSQILP<br>DPLKPTKRSFIEDLLFNKVTLDAGFMKQYGECLGDINARDLCAQKFNGLTVLPPLLTDMMIAAYTAALVSGTATAG<br>WTFGAGAALQIPFAMQMAFRFNGIGVTQNVLYENQKLIANQFNKAIQIQESLTTTSTALGKLQDVVNQNAQALNTL<br>VKQLSSNFGAISSVNLNDILSRLDKVEAEVQIDRLITGRLQSLQTYVTQQLIRAAEIRASANLAATKMSECVLGQSKRVD<br>FCGKGYHLMSPFQAAPHGVVFLHVTVYVPSQERNFTTAPAICHEGKAYFPREGVVFVNGTSWFITQRNFSPQIITTDNT<br>FVSGNCDVVIIGNNTVYDPLQPELDSFKEELDKEYFKNHTSPDVLDGDISGINASVVNIQKEIDRLNEVAKNLESIDL<br>QELGKYEYQIKWPWYVWLGFIAGLIAIVMVTILLCCMTSCCSCLKGACSCGSCCKFDEDDSEPVKGVKLVHYT                 |
| Chimera 3: | MFVFLVLLPLVSSQCVNLTTRTQLPPAYTNSFTRGVYYPDKVFRSSVHLSTQDLFLPFFSNVTFHAIHVSGTNGTKR<br>FDNPVLPFNDGVYFASTEKSNIRGWIFGTTLDSTQSLIVNNAATNVVIKVFCEFCNDPFLGVYHKNKNSWMESEF<br>RVYSSANNCTFEYVSPFLMDLEGKQGNFKNLREFVFNKIDGYFKIYKHTPINLRDLDPQGFSALEPLVDLPIGINITR<br>FQTLALHRSYLPDSSSGWTAGAAAYYVGYLQPRFTLLKYNENGTITDAVDCALDPLSETKCTLKSTVEKGIYQ<br>SNFRVQPTESIVRFPNITNLCPFGEVFNATKFPVYAWERKKISNCVADYSVLYNSTFFSTFKCYGVSATKLNLDLCSFN<br>VYADSFVVKGDDVRQIAPGQTVIADYNYKLPDDFMGCVLAWNTRNIDATSTGNYNKYRYLRHGKLRPFERDISNV<br>PFSPDGKPCPPALNCYWPLNDYGFYTTTIGIGYQPYRVVLSFELLNAPATVCGPKKSTNLVKNKCVNFNFNGLTGT<br>GVLTESNKKFLPFQFGRDIADTTDAVRDPQTEILELDITPCSFGGVSVITPGTNTSNQVAVLYQDVNCTEVPVAIHADQ<br>LTPTWRVYSTGNSVFTQTRAGCLIGAHEVNNSYECDIPIGAGICASYQTQNSPRRARSVASQSIIAYTMSLGAENSVAY<br>SNNNSIAIPTNFTISVTTEILPVSMTKTSVDCTMYICGDSTECSNLLQYGSFCTQLNRALTGIAVEQDKNTQEVFAQVKQ<br>IYKTPPIKDFGGFNFSQILPDPSPKPSKRSFIEDLLFNKVTLDAGFIKQYGDCLGDIARDLCAQKFNGLTVLPPLLTD<br>MIAQYTSALLAGTITSGWTFGAGAALQIPFAMQMAFRFNGIGVTQNVLYENQKLIANQFNSAIGKIQDLSSTASALG<br>KLQDVVNQNAQALNTLVKQLSSNFGAISSVNLNDILSRLDKVEAEVQIDRLITGRLQSLQTYVTQQLIRAAEIRASANLA<br>ATKMSECVLGQSKRVDVFCGKGYHLMSPFQSAHPGVVFLHVTVYVPAQEKNTTAPAICHGDKAHFPREGVVFVSNGTH<br>WVFTQRNFYEPQIITTDNTFVSGNCDVVIIGNNTVYDPLQPELDSFKEELDKEYFKNHTSPDVLDGDISGINASVVNIQ<br>KEIDRLNEVAKNLESIDLQELGKYEYQIKWPWYIWLGFIAGLIAIVMVTIMLCCMTSCCSCLKGCCSCGSCCKFDE<br>DSEPVKGVKLVHYT |
| Chimera 4: | MFVFLVLLPLVSSQCVNLTTRTQLPPAYTNSFTRGVYYPDKVFRSSVHLSTQDLFLPFFSNVTFHAIHVSGTNGTKR<br>FDNPVLPFNDGVYFASTEKSNIRGWIFGTTLDSTQSLIVNNAATNVVIKVFCEFCNDPFLGVYHKNKNSWMESEF<br>RVYSSANNCTFEYVSPFLMDLEGKQGNFKNLREFVFNKIDGYFKIYKHTPINLRDLDPQGFSALEPLVDLPIGINITR<br>FQTLALHRSYLPDSSSGWTAGAAAYYVGYLQPRFTLLKYNENGTITDAVDCALDPLSETKCTLKSTVEKGIYQ<br>SNFRVQPTESIVRFPNITNLCPFGEVFNATTFPSVYAWERKRISNCVADYSVLYNSTFSSTFKCYGVSATKLNLDLCSFN<br>YADSFVVKGDDVRQIAPGQTVIADYNYKLPDDFLGCVLAWNTNSKDSSTSGNYNYLYRWVRRSKLNPYERDLSNDI<br>YSPGGQSCSAVGPNCYNPLRPYGFFTAGVGHQPYRVVLSFELLNAPATVCGPKKSTNLVKNKCVNFNFNGLTGTG<br>VLTESNKKFLPFQFGRDIADTTDAVRDPQTEILELDITPCSFGGVSVITPGTNTSNQVAVLYQDVNCTEVPVAIHADQ<br>LTPTWRVYSTGNSVFTQTRAGCLIGAHEVNNSYECDIPIGAGICASYQTQNSPRRARSVASQSIIAYTMSLGAENSVAYS<br>NNSIAIPTNFTISVTTEILPVSMTKTSVDCTMYICGDSTECSNLLQYGSFCTQLNRALTGIAVEQDKNTQEVFAQVKQ<br>YKTPPIKDFGGFNFSQILPDPSPKPSKRSFIEDLLFNKVTLDAGFIKQYGDCLGDIARDLCAQKFNGLTVLPPLLTD<br>MIAQYTSALLAGTITSGWTFGAGAALQIPFAMQMAFRFNGIGVTQNVLYENQKLIANQFNSAIGKIQDLSSTASALG<br>KLQDVVNQNAQALNTLVKQLSSNFGAISSVNLNDILSRLDKVEAEVQIDRLITGRLQSLQTYVTQQLIRAAEIRASANLA<br>ATKMSECVLGQSKRVDVFCGKGYHLMSPFQSAHPGVVFLHVTVYVPAQEKNTTAPAICHGDKAHFPREGVVFVSNGTH<br>WVFTQRNFYEPQIITTDNTFVSGNCDVVIIGNNTVYDPLQPELDSFKEELDKEYFKNHTSPDVLDGDISGINASVVNIQ<br>KEIDRLNEVAKNLESIDLQELGKYEYQIKWPWYIWLGFIAGLIAIVMVTIMLCCMTSCCSCLKGCCSCGSCCKFDE<br>DSEPVKGVKLVHYT   |
